# Supplementary material for: 3D ultrasound guidance for radiofrequency ablation in an anthropomorphic thyroid nodule phantom
Source: PubMed Central journal article supplement (PMC11473505; doi:10.1186/s41747-024-00513-6), 2024-10-14
Supplement: 41747_2024_513_MOESM2_ESM.pdf [file 41747_2024_513_MOESM2_ESM.pdf]

# **3D ultrasound guidance for radiofrequency ablation in an anthropomorphic thyroid nodule phantom**

## **ELECTRONIC SUPPLEMENTARY MATERIAL**

### **Supplementary Video 1.**

A matrix transducer recording of an RF-electrode placement from the isthmus into the phantom nodule, showing two real-time scanning planes at the same time. The transversal scanning plane (left) is parallel to the RF-electrode and shows the in-plane insertion (as well as the trachea on the left and the carotid artery on the right), the sagittal plane (right) is orthogonal to the RF-electrode and shows the out-of-plane insertion.
